# Supplementary material for: Actin-related protein 5 functions as a novel modulator of MyoD and MyoG in skeletal muscle and in rhabdomyosarcoma
Source: eLife. 2022 Mar 29;11:e77746. doi: 10.7554/eLife.77746 (PMC8983046; doi:10.7554/eLife.77746)
Supplement: Figure 1—source data 1. [file elife-77746-fig1-data1.xlsx]

## Sheet: Sheet1
Figure 1C- Arp5 expression and muscle fiber cross-sectional area in AAV6-vector infected hind limb muscles														Figure 1D- Myogenic gene expression in AAV6-vector infected hind limb muscles														Figure 1E- Fusion index of differentiated C2C12 cells transfected with GFP alone or together with Arp5							Figure 1G- Myogenic gene expression in Arp5-transfected C2C12 cells
														Myod1							Myh4
control AAV	Arp5 AAV			control AAV	Arp5-AAV		control AAV	Arp5-AAV			control AAV	Arp5-AAV		control AAV	Arp5 AAV			control AAV	Arp5-AAV		control AAV	Arp5 AAV			control AAV	Arp5-AAV		GFP	GFP+Arp5			GFP	GFP+Arp5		Myod1
0.904627	458.996		average	1	1557.79		1678	644		average	1282.29	843.66		0.902401	0.64213		average	1	0.599314		0.550506	0.693793		average	1	0.620653		54.3053	7.6632		average	49.5972	11.6699			control			Arp5OE					control			Arp5OE
0.993779	41.8598		SEM	0.0934564	311.563		982	988		SEM	35.7277	35.8094		1.13981	0.770075		SEM	0.0895959	0.057505		1.92382	0.757823		SEM	0.198606	0.0591472		34.8706	2.34114		SEM	2.96575	3.04377		GM	DM1	DM3	GM	DM1	DM3			GM	DM1	DM3	GM	DM1	DM3
0.807276	2620.12		P value		0.000638188		1453	1128		P value		1.87385e-15		1.13088	0.501687		P value		0.0011237		1.44018	0.699938		P value		0.0431377		61.7834	3.91808		P value		2.06714e-08		0.0819028	0.997356	1.55592	0.054957	0.975527	1.17937		average	0.104106	1	0.979593	0.123554	0.659553	0.92789
0.678148	1156.77						1631	859						0.711172	0.837124						0.456475	0.528779						61.9151	10.9603						0.128773	0.975527	0.690365	0.119571	0.545721	1.23956		SEM	0.0102028	0.0191835	0.199766	0.0247747	0.10613	0.169634
1.09285	1009.78						1062	487						1.38375	0.73744						1.03504	0.736875						39.4382	6.01427						0.11138	1.05505	0.940599	0.162089	0.589583	0.531506		P value				0.495264	0.0196475	0.850119
1.45062	2042.61						1313	1390						0.755647	0.460258						0.677932	0.409622						54.3379	10.2964						0.0943693	0.972071	0.73149	0.157599	0.527382	0.761126
1.0727	2027.13						1391	486						0.976346	0.810419						0.916049	0.707696						52.3519	21.0041
	1983.69						1188	660							0.5688							0.898687						52.2444	24.1249						Myog
	2679.11						1119	961							0.300309							0.174881						56.6698	1.21681							control			Arp5OE					control			Arp5OE
							863	754							0.663601							0.56454						37.1046	7.82361						GM	DM1	DM3	GM	DM1	DM3			GM	DM1	DM3	GM	DM1	DM3
							1457	344							0.300607							0.654549						40.5479	33.0061						0	0.345957	1.05275	0	0.124426	0.455011		average	7.23417e-05	0.355999	1	0.000293466	0.0861259	0.403466
							1759	436																											8.8295e-05	0.345957	0.597663	0.000400941	0.0678233	0.468		SEM	2.61542e-05	0.0165779	0.210622	0.000106428	0.0131201	0.0472715
							1467	608						Myog							Acta1														7.67571e-05	0.404084	0.783273	0.000488819	0.0704786	0.264013		P value				0.0901929	1.41882e-05	0.0327022
							984	1135						control AAV	Arp5 AAV			control AAV	Arp5-AAV		control AAV	Arp5 AAV			control AAV	Arp5-AAV									0.000124315	0.327997	1.56631	0.000284105	0.0817755	0.426841
							1329	780						1.1144	0.694037		average	1	0.627778		0.589898	0.804852		average	1	0.63268
							1263	963						0.496	0.75506		SEM	0.165092	0.0722108		1.68037	0.653553		SEM	0.162981	0.0594164									Mrf6
							1232	607						0.444803	0.502743		P value		0.0319859		1.23915	0.659705		P value		0.0247468										control			Arp5OE					control			Arp5OE
							714	1208						1.02206	0.729074						0.575889	0.776429													GM	DM1	DM3	GM	DM1	DM3			GM	DM1	DM3	GM	DM1	DM3
							1369	1283						0.990959	0.527837						1.24928	0.911079													0.0262253	0.051432	1.55165	0.00968796	0.0664144	0.434978		average	0.0358873	0.0473054	1	0.0231758	0.0450302	0.230049
							1336	475						1.72541	1.08355						0.578368	0.414281													0.0506066	0.051432	0.701929	0.0239539	0.0390027	0.201493		SEM	0.00578163	0.00243905	0.188666	0.00796439	0.00802858	0.0702683
							1310	665						1.20637	0.783104						1.08705	0.74773													0.0396166	0.0444582	0.842998	0.0137528	0.0283527	0.120804		P value				0.244017	0.795361	0.00871613
							1581	1281							0.514034							0.687153													0.0271006	0.0418996	0.903423	0.0453086	0.0463511	0.162923
							1562	609							0.241642							0.258497
							1528	973							0.768342							0.648449													Myh3
							1604	1146							0.30613							0.397754														control			Arp5OE					control			Arp5OE
							1449	1197																											GM	DM1	DM3	GM	DM1	DM3			GM	DM1	DM3	GM	DM1	DM3
							1449	428						Myf6							Tnni1														5.43069e-05	0.252414	1.13995	0.000137222	0.0673286	0.327762		average	0.00010087	0.24676	1	0.000400251	0.055806	0.287471
							1301	761						control AAV	Arp5 AAV			control AAV	Arp5-AAV		control AAV	Arp5 AAV			control AAV	Arp5-AAV									0.000143163	0.252414	0.757323	0.000730739	0.0526191	0.454948		SEM	2.58119e-05	0.0086362	0.101468	0.000129414	0.00538928	0.0699679
							1170	615						0.682022	0.744481		average	1	0.646048		0.221064	0.102615		average	1	0.326101									0.000147888	0.260691	1.19242	0.000265789	0.0423952	0.122389		P value				0.0637836	1.48211e-06	0.00117122
							1323	1326						1.73498	0.782521		SEM	0.145805	0.0502161		1.74624	0.0945019		SEM	0.294608	0.0995187									5.81205e-05	0.221521	0.910306	0.000467257	0.060881	0.244787
							1306	574						1.01065	0.558825		P value		0.0155509		0.385858	0.756367		P value		0.0208811
							835	813						0.843713	0.844706						2.01853	1.1028
							1357	680						1.17374	0.622914						0.968186	0.287584
							980	683						0.55632	0.567548						0.119999	0.396374
							1383	436						0.998576	0.659786						1.54013	0.0634258
							1348	1349							0.749676							0.0841855
							950	701							0.287584							0.226795
							1135	1232							0.811379							0.0993037
							2212	733							0.47711							0.373153
							1495	1565
							1287	1335						Myh1
							1278	707						control AAV	Arp5 AAV			control AAV	Arp5-AAV
							1162	1335						0.573314	0.285764		average	1	0.564574
							1229	1174						1.69116	0.588683		SEM	0.199285	0.0772638
							1572	329						1.50124	0.869101		P value		0.031145
							660	1335						0.637334	0.745073
							809	1209						1.39572	1.00423
							1209	842						0.326861	0.341382
							1341	959						0.874375	0.685284
							1391	1207							0.363081
							1236	1365							0.171654
							1441	667							0.576131
							1423	434							0.579931
							1292	975
							1553	606
							1104	438
							1504	889
							833	495
							1419	710
							1179	726
							1576	1178
							1317	527
							1828	890
							1211	1111
							1224	432
							1330	1146
							1234	1734
							1131	956
							1409	1420
							677	835
							1295	576
							650	1339
							1719	303
							1895	1053
							1069	755
							1452	432
							957	720
							1518	750
							1438	566
							971	1083
							503	324
							1146	1154
							1481	1346
							1714	358
							1077	795
							1167	1079
							1546	594
							2097	769
							1778	932
							1468	548
							1105	1098
							907	463
							1389	243
							1439	95
							540
							2384
							1045
							1290
							370
							92
[truncated: 24 more columns]
