# Supplementary material for: Actin-related protein 5 functions as a novel modulator of MyoD and MyoG in skeletal muscle and in rhabdomyosarcoma
Source: eLife. 2022 Mar 29;11:e77746. doi: 10.7554/eLife.77746 (PMC8983046; doi:10.7554/eLife.77746)
Supplement: Figure 2—source data 1. [file elife-77746-fig2-data1.xlsx]

## Sheet: Sheet1
	Figure 2A- Arp5 expression in normal skeletal muscle, tumor-adjacent skeletal muscle, ERMS, and ARMS											Figure 2B- Arp5 expression in human primary myoblasts and RD cells							Figure 2E- Myogenic gene expression in control-, Arp5-, Ies6-, and Ino80-si RD cells
	normal	tumor-adjacent	ERMS	ARMS			normal	tumor-adjacent	ERMS	ARMS		control AAV	Arp5 AAV			control AAV	Arp5-AAV		Myod1
	149.3	153	143.8	193.5		average	139.5	128.967	163.613	199.85		1.07599	1.64322		average	1	2.39606		control	Arp5 si	Ies6 si	Ino80 si			control	Arp5 si	Ies6 si	Ino80 si
	120.3	120.8	160.4	194.9		P value			0.0228067	0.00324013		1.51721	3.13932		SEM	0.150856	0.208714		1	1.17096	1.27678	1.19997		average	1	1.17296	1.23626	1.31077
	148.9	113.1	158.5	192.9								0.921799	2.43366		P value		0.000546888		1	1.08966	1.36653	1.16455		SEM	0	0.0297136	0.0776902	0.10411
			154.4	201.6								0.889375	2.83534						1	1.21311	1.0108	1.26127		P value		0.00112993	0.0227737	0.0244768
			141.5	265.8								0.59563	2.65337						1	1.21813	1.29091	1.6173
			170.9	131									2.33977
			214	218.1									1.72776						Myog
			165.4	245.9															control	Arp5 si	Ies6 si	Ino80 si			control	Arp5 si	Ies6 si	Ino80 si
				220.5															1	2.84044	1.75763	1.20489		average	1	2.20425	1.19666	0.882116
				134.3															1	2.68405	1.08175	0.79977		SEM	0	0.325747	0.19311	0.111839
																			1	1.73475	0.873341	0.690384		P value		0.0101257	0.347795	0.332443
																			1	1.55775	1.0739	0.833422
																			Myf6
																			control	Arp5 si	Ies6 si	Ino80 si			control	Arp5 si	Ies6 si	Ino80 si
																			1	1.84553	1.41918	0.962213		average	1	2.0331	1.40718	1.04376
																			1	2.11455	1.12676	0.805237		SEM	0	0.0632002	0.17061	0.101644
																			1	2.07065	1.8838	1.27165		P value		3.33754e-06	0.0542773	0.681832
																			1	2.10168	1.19897	1.13595
																			Cdh15
																			control	Arp5 si	Ies6 si	Ino80 si			control	Arp5 si	Ies6 si	Ino80 si
																			1	1.96162	1.6347	1.30729		average	1	1.64045	1.19501	1.15883
																			1	1.66427	1.05908	0.955797		SEM	0	0.120517	0.162516	0.0803653
																			1	1.39358	0.871379	1.10627		P value		0.00180515	0.275389	0.0955037
																			1	1.54232	1.21488	1.26597
																			Mybph
																			control	Arp5 si	Ies6 si	Ino80 si			control	Arp5 si	Ies6 si	Ino80 si
																			1	2.3384	1.03471	0.978899		average	1	2.42011	1.35899	1.50587
																			1	2.61238	1.62084	1.76265		SEM	0	0.0852703	0.131966	0.183263
																			1	2.22791	1.26116	1.534		P value		2.99056e-06	0.0346288	0.0328381
																			1	2.50175	1.51924	1.74794
																			Mylpf
																			control	Arp5 si	Ies6 si	Ino80 si			control	Arp5 si	Ies6 si	Ino80 si
																			1	2.57267	0.972348	1.04961		average	1	2.04931	0.906918	1.19806
																			1	1.99907	0.88173	1.04451		SEM	0	0.180335	0.0311153	0.0909657
																			1	1.78201	0.832516	1.28552		P value		0.00113237	0.0242723	0.0723258
																			1	1.84348	0.941077	1.41261
																			Tnni2
																			control	Arp5 si	Ies6 si	Ino80 si			control	Arp5 si	Ies6 si	Ino80 si
																			1	1.955	0.783016	0.776134		average	1	2.77054	1.10637	1.4299
																			1	2.94991	1.28226	1.50875		SEM	0	0.322649	0.134859	0.227048
																			1	3.50672	1.36967	1.61805		P value		0.00153264	0.460284	0.107143
																			1	2.67052	0.990525	1.81665
																			Atp2a1
																			control	Arp5 si	Ies6 si	Ino80 si			control	Arp5 si	Ies6 si	Ino80 si
																			1	2.97423	1.13994	0.467547		average	1	2.3161	0.960862	0.528012
																			1	2.91529	1.06769	0.542582		SEM	0	0.365761	0.0990712	0.0245239
																			1	1.79416	0.947196	0.584839		P value		0.0113905	0.706467	1.2733e-06
																			1	1.58072	0.688623	0.517079
