# Supplementary material for: Actin-related protein 5 functions as a novel modulator of MyoD and MyoG in skeletal muscle and in rhabdomyosarcoma
Source: eLife. 2022 Mar 29;11:e77746. doi: 10.7554/eLife.77746 (PMC8983046; doi:10.7554/eLife.77746)
Supplement: Figure 2—source data 3. [file elife-77746-fig2-data3.xlsx]

## Sheet: Sheet1
	Figure 2 - source data 3. List of the myogenic genes whose expression level is upregulated by Arp5 knockdown in RD cells
		relative expression level (vs control siRNA)
	gene name	Arp5 siRNA	Ies6 siRNA	Ino80 siRNA
	ACTN3	2.076	0.687843	0.938971
	ATP2A1	2.21293	0.643114	0.418974
	CDH15	1.83505	1.238	1.3845
	CKM	1.74724	0.743828	0.996855
	MEF2B	1.51975	1.03725	1.0343
	MYBPH	3.36662	1.22296	1.99344
	MYH7B	4.73446	0.719439	0.806704
	MYH8	2.64423	1.95019	0.185822
	MYLPF	2.27943	0.962704	1.35538
	MYOG	1.74353	0.955793	0.7342
	TNNI2	3.29711	1.23334	1.63051
	TNNT2	2.81111	0.606931	1.85544
	TNNT3	2.37631	1.22717	1.54952
	CDKN1A	1.43876	1.61401	2.51024
