# Supplementary material for: Actin-related protein 5 functions as a novel modulator of MyoD and MyoG in skeletal muscle and in rhabdomyosarcoma
Source: eLife. 2022 Mar 29;11:e77746. doi: 10.7554/eLife.77746 (PMC8983046; doi:10.7554/eLife.77746)
Supplement: Figure 3—source data 1. [file elife-77746-fig3-data1.xlsx]

## Sheet: Sheet1
	Figure 3B- Myogenic gene expression in WT and Arp5-KO RD cells											Figure 3C- growth curve of WT and Arp5-KO cells														Figure 3D- tumor volems of xenografted WT and Arp5-KO RD cells													Figure 3E- myogenic gene expression in xenograft tumors
	Myod1												WT	C39	C45	C67				WT	C39	C45	C67				WT	C39	C45	C67				WT	C39	C45	C67		Myod1
	WT	C39	C45	C67			WT	C39	C45	C67		9h	84	63	65	82		average(log2)	9	6.19055	5.98188	6.13232	6.37983			0w	0	0	0	0		average	0w	0	0	0	0		WT	KO			WT	KO
	1	1.84309	1.86021	1.48668		average	1	1.65953	1.97365	1.4651			64	70	66	75			24	6.78435	6.37724	6.5419	6.83014				0	0	0	0			1w	0	0	0	0		1.60847	2.97739		average	1	2.67114
	1	1.46461	1.55707	1.12632		SEM	0	0.231605	0.259406	0.161583			67	67	68	92			33	7.10689	6.5648	7.08233	7.12711				0	0	0	0			2w	0	0	0	0		1.00744	1.89643		SEM	0.148363	0.314691
	1	2.19998	2.72888	1.89551		P value		0.0292712	0.00947193	0.0281169			79	54	83	85			48	7.59631	7.10045	7.62271	7.76957				0	0	0	0			3w	7	0	0	0		0.749921	2.47261		P value		0.00100444
	1	1.13046	1.74844	1.35188								24h	112	85	84	95			57	7.90556	7.50388	8.17565	8.08777					0	0	0			4w	69	2	0	0		1.05851	3.56529
													111	92	103	116			72	8.29199	8.04347	8.64117	8.695					0	0	0			5w	1168.12	30.6667	2	0		0.57566	2.44396
	Myog												95	86	88	130		SEM	9	0.187378	0.163672	0.164058	0.122248			1w	0	0	0	0			6w	1378.88	58.5	13.6667	3.25
	WT	C39	C45	C67			WT	C39	C45	C67			125	71	99	117			24	0.162846	0.159792	0.138725	0.188938				0	0	0	0		SEM	0w	0	0	0	0		Myog
	1	6.50993	7.38039	7.56436		average	1	5.53961	7.58807	6.87408		33h	148	97	130	147			33	0.0789788	0.0695333	0.226137	0.0920545				0	0	0	0			1w	0	0	0	0		WT	KO			WT	KO
	1	4.66076	6.58628	6.12781		SEM	0	0.535765	0.646732	0.41564			139	100	111	128			48	0.0815175	0.145	0.0671029	0.118086				0	0	0	0			2w	0	0	0	0		1.13615	3.89659		average	1	3.30162
	1	5.44813	8.79755	6.93007		P value		0.00106337	0.000523138	0.000145514			135	92	159	146			57	0.199062	0.121398	0.0822699	0.0940571					0	0	0			3w	3.87298	0	0	0		1.00063	2.98337		SEM	0.0807763	0.3821
													130	90	147	139			72	0.0754294	0.0935978	0.167626	0.0869154					0	0	0			4w	19.3789	1.26491	0	0		0.634436	2.60949		P value		0.000190952
	Tnni1											48h	185	128	187	228		t2		29.7362	29.818	23.7712	26.7171			2w	0	0	0	0			5w	338.909	23.5891	1.26491	0		1.06776	2.69834
	WT	C39	C45	C67			WT	C39	C45	C67			186	147	201	195											0	0	0	0			6w	339.658	40.6315	10.0064	2.27211		1.16103	4.32031
	1	9.6328	7.2929	7.01877		average	1	6.76137	6.14614	5.55354			195	152	208	235											0	0	0	0		P values			0.00130214	0.000954756	0.000904248
	1	3.42977	2.9507	2.12628		SEM	0	1.29651	1.0778	1.208			209	124	193	217											0	0	0	0									Tnni1
	1	7.59171	6.77333	7.45467		P value		0.00435823	0.00307968	0.00929421		57h	283	178	273	260												0	0	0									WT	KO			WT	KO
	1	6.39119	7.56765	5.61442									251	205	282	261												0	0	0									1.29659	7.18426		average	1	8.4789
													227	176	312	299										3w	6	0	0	0									1.37617	9.12094		SEM	0.118049	0.919142
	Mybph												205	169	291	270											0	0	0	0									0.852775	11.4393		P value		1.90114e-05
	WT	C39	C45	C67			WT	C39	C45	C67		72h	320	262	390	446											4	0	0	0									0.759051	7.35744
	1	8.6578	10.2922	10.7116		average	1	9.07481	15.2388	13.0216			295	245	424	385											18	0	0	0									0.71541	7.2926
	1	9.39404	16.3114	13.7443		SEM	0	0.154209	1.83998	0.83554			307	263	448	412												0	0	0
	1	9.1726	19.1127	14.6088		P value		3.25592e-09	0.000244551	7.05921e-06			333	287	343	417												0	0	0									Mybph
	1	9.07481	15.2388	13.0216																						4w	108	0	0	0									WT	KO			WT	KO
													log2														18	0	0	0									1.42065	21.2411		average	1	26.2793
	Mylpf												WT	C39	C45	C67											62.5	6	0	0									0.924211	39.8556		SEM	0.103129	4.99054
	WT	C39	C45	C67			WT	C39	C45	C67		9h	6.39232	5.97728	6.02237	6.35755											87.5	6	0	0									1.06803	33.8999		P value		0.000475201
	1	12.4117	8.64849	9.13298		average	1	10.4694	9.49376	8.7073			6	6.12928	6.04439	6.22882												0	0	0									0.9059	17.9132
	1	7.88989	9.82921	6.21884		SEM	0	0.950113	0.300962	0.941128			6.06609	6.06609	6.08746	6.52356												0	0	0									0.681211	18.4868
	1	11.1066	10.0036	10.7701		P value		5.90347e-05	1.30984e-07	0.000178646			6.30378	5.75489	6.37504	6.40939										5w	526.5	0	0	0
	1	10.4694	9.49376	8.7073								24h	6.80735	6.40939	6.39232	6.56986											665.5	0	6	0									Ppfia4
													6.79442	6.52356	6.6865	6.85798											1568	40	6	0									WT	KO			WT	KO
	Myh3												6.56986	6.42626	6.45943	7.02237											1912.5	144	0	0									1.43826	17.8307		average	1	14.0515
	WT	C39	C45	C67			WT	C39	C45	C67			6.96578	6.14975	6.62936	6.87036												0	0	0									0.75134	10.8752		SEM	0.124555	1.7691
	1	10.5092	10.5254	12.4197		average	1	8.23994	9.82993	10.5584		33h	7.20945	6.59991	7.02237	7.19967												0	0	0									1.15863	17.9227		P value		3.61332e-05
	1	5.07712	5.95438	5.8749		SEM	0	1.15295	1.46106	1.66745			7.11894	6.64386	6.79442	7										6w	750	6	0	6									1.04348	12.4106
	1	9.13346	13.01	13.3807		P value		0.000758566	0.000928609	0.0012238			7.07682	6.52356	7.31288	7.18982											864	0	6	0									0.608294	11.2185
	1	8.23994	9.82993	10.5584									7.02237	6.49185	7.19967	7.11894											1764	100	62.5	0
												48h	7.53138	7	7.54689	7.83289											2137.5	245	0	0									Cdkn1a
	Tnni2												7.53916	7.19967	7.65105	7.60733												0	0	0									WT	KO			WT	KO
	WT	C39	C45	C67			WT	C39	C45	C67			7.60733	7.24793	7.70044	7.87652												0	13.5	13.5									1.52979	14.0444		average	1	13.4173
	1	9.51781	4.44078	5.98852		average	1	14.093	9.18359	11.49			7.70736	6.9542	7.59246	7.76155																							0.88149	8.68775		SEM	0.133435	1.71049
	1	12.332	8.60117	9.90168		SEM	0	2.31264	2.06542	2.63083		57h	8.14466	7.47573	8.09276	8.02237																							0.948401	11.3248		P value		4.08832e-05
	1	20.4291	14.5088	18.5799		P value		0.0013052	0.0074331	0.00722248			7.97154	7.67948	8.13955	8.02791																							1.08137	17.0057
	1	14.093	9.18359	11.49									7.82655	7.45943	8.2854	8.224																							0.558948	16.024
													7.67948	7.40088	8.18488	8.07682
	Tnnt2											72h	8.32193	8.03342	8.60733	8.8009
	WT	C39	C45	C67			WT	C39	C45	C67			8.20457	7.93664	8.72792	8.58871
	1	5.11028	6.00709	5.7628		average	1	3.65114	4.90683	4.3541			8.26209	8.03892	8.80735	8.6865																								å
	1	1.90405	2.44898	2.23781		SEM	0	0.66234	0.870569	0.761784			8.37938	8.16491	8.42206	8.7039
	1	3.93909	6.26443	5.06168		P value		0.00709726	0.0041582	0.00455386
	1	3.65114	4.90683	4.3541
	Tnnt3
	WT	C39	C45	C67			WT	C39	C45	C67
	1	16.4857	13.283	14.2373		average	1	16.1582	16.0472	16.6311
	1	24.1532	28.1428	29.2439		SEM	0	3.04458	4.25093	4.43051
	1	9.48957	8.26996	8.47812		P value		0.00250489	0.0122227	0.012397
	1	14.5042	14.4931	14.5649
	Tnnc2
	WT	C39	C45	C67			WT	C39	C45	C67
	1	11.9108	5.55427	5.15143		average	1	10.3125	5.19108	4.95721
	1	9.89737	4.48845	4.69211		SEM	0	0.586427	0.248464	0.0970492
	1	9.12931	5.53052	5.0281		P value		3.95712e-06	2.77414e-06	1.45483e-08
	1	10.3125	5.19108	4.95721
	Myl1
	WT	C39	C45	C67			WT	C39	C45	C67
	1	8.56951	9.56766	9.11538		average	1	8.76819	10.6431	9.54998
	1	6.38634	6.6547	6.5606		SEM	0	1.43596	2.66796	1.86408
	1	11.3487	15.7071	12.9739		P value		0.00565535	0.0224679	0.0101321
	Myl4
	WT	C39	C45	C67			WT	C39	C45	C67
	1	18.6857	16.1392	14.8037		average	1	12.3314	12.1997	9.74138
	1	13.3383	15.8984	10.2754		SEM	0	3.9912	3.81976	3.08842
	1	4.97023	4.56145	4.1451		P value		0.0469102	0.0427266	0.0473273
	Hrc
	WT	C39	C45	C67			WT	C39	C45	C67
	1	3.75572	4.76914	3.787		average	1	5.45962	7.25639	5.89835
	1	4.58646	5.02749	3.37629		SEM	0	1.71815	2.85252	2.52561
	1	10.519	15.7532	13.4587		P value		0.0409031	0.0707541	0.100516
	1	2.97735	3.47576	2.9714
	Ppfia4
	WT	C39	C45	C67			WT	C39	C45	C67
	1	16.5861	14.1276	14.6518		average	1	11.7531	11.7106	10.055
	1	6.78931	6.01642	4.53888		SEM	0	2.82884	2.85792	2.95531
	1	11.8839	14.9879	10.9745		P value		0.0190834	0.0199869	0.0375122
