# Supplementary material for: Actin-related protein 5 functions as a novel modulator of MyoD and MyoG in skeletal muscle and in rhabdomyosarcoma
Source: eLife. 2022 Mar 29;11:e77746. doi: 10.7554/eLife.77746 (PMC8983046; doi:10.7554/eLife.77746)
Supplement: Figure 4—source data 1. [file elife-77746-fig4-data1.xlsx]

## Sheet: Sheet1
	Figure 4E- MyoG promoter-controlled luciferase reporter assay							Figure 4F- MyoG promoter-controlled luciferase reporter assay								Figure 4G- percentages of MyoG/MHC double positive cells							Figure 4H- endogenous myogenic gene expression in 10T1/2 cells transfected with MyoG and Arp5
		none	MyoD	MyoD+Arp5	dCR	dCR+Arp5				control siRNA			Ino80 siRNA			mock			Arp5				Myod1					control	MyoG	MyoG+Arp5
	Luc/Gal	0.946274	64.2853	19.4451	5.41994	4.8895			none	MyoD	MyoD+Arp5	none	MyoD	MyoD+Arp5		MyoG+	MyoG+/MHC+	%	MyoG+	MyoG+/MHC+	%		control	MyoG	MyoG+Arp5		average	3.30344e-07	1	0.107794
		1.30752	69.5278	22.3689	9.39552	7.91522		Luc/Gal	1.73899	66.3378	14.4123	1.60326	78.9946	31.8929		98	65	66.3265	77	15	16.3043		0	1	0.103025		SEM	3.30344e-07	0	0.00407821
		0.746202	66.2268	16.6515	8.40891	8.29941			0.760621	53.9901	18.0276	1.34807	79.8611	8.46108		103	53	51.4563	119	35	22.7273		0	1	0.115909		P value			2.61884e-09
	average	1	66.68	19.4885	7.74146	7.03471			0.50039	80.9278	25.0077	1.53302	41.4236	12.3067		88	51	57.9545	92	28	23.3333		9.91033e-07	1	0.104449
	SEM	0.164252	1.53025	1.65062	1.19519	1.07832		average	1	67.0852	19.1492	1.49478	66.7597	17.5535		127	79	62.2047	82	37	31.0924
	P values			3.05846e-05		0.683302		SEM	0.377054	7.78523	3.10961	0.0761087	12.6706	7.25509			Average	59.4855		Average	23.3643		Myog					control	MyoG	MyoG+Arp5
								P values			0.00462826			0.0280402			SEM	3.1755		SEM	3.02729		control	MyoG	MyoG+Arp5		average	0.000190829	1	0.123116
																				P value	0.000173426		0	1	0.119706		SEM	0.000190829	0	0.0037059
																							0	1	0.119121		P value			1.91384e-09
																							0.000572486	1	0.13052
																							Ckm					control	MyoG	MyoG+Arp5
																							control	MyoG	MyoG+Arp5		average	0.00125383	1	0.0535801
																							0	1	0.0711929		SEM	0.00125383	0	0.00922545
																							0.0037615	1	0.0495349		P value			5.41367e-08
																							0	1	0.0400125
																							Myh3					control	MyoG	MyoG+Arp5
																							control	MyoG	MyoG+Arp5		average	0.00231439	1	0.127109
																							0	1	0.0893035		SEM	0.00231439	0	0.0580941
																							0	1	0.0508648		P value			0.00011432
																							0.00694318	1	0.241158
																							Arp5					control	MyoG	MyoG+Arp5
																							control	MyoG	MyoG+Arp5		average	1	1.13831	34.018
																							1	1.45988	58.6345		SEM	0.357212	0.323773	11.3126
																							2.65889	2.74666	79.7795		P value			0.0433635
																							0.993799	1.08965	19.8611
