# Supplementary material for: Actin-related protein 5 functions as a novel modulator of MyoD and MyoG in skeletal muscle and in rhabdomyosarcoma
Source: eLife. 2022 Mar 29;11:e77746. doi: 10.7554/eLife.77746 (PMC8983046; doi:10.7554/eLife.77746)
Supplement: Figure 5—source data 1. [file elife-77746-fig5-data1.xlsx]

## Sheet: Sheet1
	Figure 5A- Binding affinity of MYOD protein for ARP5, PBX1a, and MEIS1b proteins									Figure 5 D- PME1/2-TATA-controlled luciferase reporter assay
										PME1-TATA
		ARP5 concentration (µM)									none	PM	Myod	PM/MyoD
		1	2	4	8	16		Kd value		Luc/Gal	0.844584	1.28353	1.51719	5.30464
	relative band intensity	8.08181	36.0289	79.3272	93.0372	98.1828		2.19115			1.10504	0.857789	1.06618	5.1907
		1.18207	12.308	36.3448	51.4384	85.1398		5.27396			1.05037	0.844319	1.18169	5.0415
		3.12614	16.4446	50.6082	71.3003	86.2635		3.56236		average	1	0.995213	1.25502	5.17895
		2.46708	4.55667	18.0556	37.8186	50.8684		5.09379		SEM	0.0792941	0.144211	0.135261	0.0761888
	average	3.71427	17.3346	46.084	63.3986	80.1136		4.03032		P values		0.978189	0.179172	1.45476e-05
	SEM	1.51076	6.70081	12.9294	12.0356	10.1852		0.723368
										PME2-TATA
											none	PM	Myod	PM/MyoD
		PBX1a concentration (µM)								Luc/Gal	0.880069	0.947884	3.10648	7.71192
		1	2	4	8	16		Kd value			1.11364	1.35285	3.26626	5.01222
	relative band intensity	55.9631	72.703	85.7581	88.2144	100		0.758853			1.00629	1.2908	3.40666	6.73125
		22.6958	53.8149	66.2569	73.4846	100		2.14331		average	1	1.19718	3.2598	6.48513
		19.697	56.4732	83.7623	90.2083	100		1.59938		SEM	0.067499	0.125927	0.0867143	0.788994
		6.61927	37.747	86.741	83.6851	100		2.24347		P values		0.239687	3.30267e-05	0.0153054
	average	26.2438	55.1845	80.6295	83.8981	100		1.68625
	SEM	10.5032	7.15601	4.83079	3.7298	4.10232e-15		0.339977
		MEIS1b concentration (µM)
		1	2	4	8	16		Kd value
	relative band intensity	0	3.3216	7.19249	29.9171	48.9985		7.18312
		0	0	0.323683	2.41603	24.3756		13.9363
		0	0	6.12753	10.4723	40.5109		10.5529
		0	0	2.28964	15.3022	41.901		10.2592
	average	0	0.8304	3.98333	14.5269	38.9465		10.4829
	SEM	0	0.8304	1.61136	5.77764	5.2004		1.3805
