# Supplementary material for: Actin-related protein 5 functions as a novel modulator of MyoD and MyoG in skeletal muscle and in rhabdomyosarcoma
Source: eLife. 2022 Mar 29;11:e77746. doi: 10.7554/eLife.77746 (PMC8983046; doi:10.7554/eLife.77746)
Supplement: Figure 7—source data 1. [file elife-77746-fig7-data1.xlsx]

## Sheet: Sheet1
	Figure 7A- fold changes (log2) in the expression level of Brg-dependent and Brg1-independent myogenic genes by Arp5, Ies6, and Ino80 knockdoun									Figure 7B- ChIP analysis in WT and Arp5-KO RD cells												Figure 7C- DNAse I sensitivity assay of the enhancer lci in WT and Arp5-KO RD cells										Figure 7F- Genomic distribution of ChIP-Seq peaks in WT and Arp5-KO cells				Figure 7I- Enrichment analysis of the KO-predominant peaks by ChIP-Seq database ChIP-Atlas
	Brg1-dependent									Myog
	Arp5si	Ies6si	Ino80si			Arp5si	Ies6si	Ino80si			control		MyoD		MyoG		Pbx1/2/3		Brg1				Myog		Tnni1		Mybph		Ppfia4				WT	KO		antibody	accession number	overlap (dataset)	overlap (control)	LogP values
	1.7513	0.419602	1.41568		average	0.693953	-0.202497	0.172025			WT	KO	WT	KO	WT	KO	WT	KO	WT	KO			WT	KO	WT	KO	WT	KO	WT	KO		promoter(<1kb/TSS)	9.61141	7.24675		MyoD1	GSM2259153	485/4156	9/4156	-136.0
	1.7212	0.371917	0.995261		P values		1.90765e-06	0.00615723			0	0	0.0486534	0.290657	0.0171482	0.140868	0.00735363	0.02426	0.0149194	0.120214			11.4604	4.70431	34.4388	10.1351	6.85285	0.954957	17.803	5.22834		5'UTR	3.28648	1.19929		MyoD1	GSM3831286	476/4156	11/4156	-130.4
	1.49114	0.302568	0.891764								0	0	0.0520368	0.350282	0.0220767	0.229992	0.00861943	0.028701	0.0353421	0.142317			10.7516	4.41607	43.0454	9.32971	6.64671	2.36296	22.9335	8.52556		3'UTR	1.38487	2.34754		MEF2B	GSM1647185	73/4156	7/4156	-14.4
	1.32346	0.290372	0.82106								0	0	0.0199407	0.305071	0.00964345	0.0945142	0.0154152	0.0180425	0.029556	0.113303			14.2628	2.55606	50.5246	12.7644	8.28088	1.68846	23.5172	5.65991		exon1	3.07979	1.91375		MEF2C	GSM2944368	61/4156	4/4156	-13.5
	1.18867	0.217466	0.705327							average	0	0	0.0402103	0.315337	0.0162895	0.155125	0.0104627	0.0236678	0.0266058	0.125278			6.48085	5.24099	25.7452	8.53293	6.51508	1.08832	16.9724	7.72335		other exons	4.58867	3.11304		Pbx3	GSM1010887	247/4156	13/4156	-57.9
	1.06514	0.211452	0.55129							SEM	0	0	0.0101818	0.0179613	0.00361477	0.0397534	0.00250303	0.00309106	0.00607728	0.00875024		average	10.4984	4.07104	39.7718	10.209	7.14755	1.71325	21.141	7.30294		intron1	18.7474	15.4631		Pbx1	GSM2290173	168/4156	8/4156	-40.1
	1.05628	0.164785	0.514346							P values				0.000183346		0.0253966		0.0293781		0.000755693		SEM	2.25001	0.794042	7.33807	1.29824	0.567933	0.368167	2.09113	0.853533		other introns	27.222	23.7305		Brg1(SMARCA4)	GSM3558580	169/4156	12/4156	-36.6
	1.04527	-0.0109479	0.488981																			P values		0.00893342		0.00202073		3.99009e-05		0.0003602		downstream(<1kb/TES)	0.248036	0.127584		Brg1(SMARCA4)	GSM3094367	148/4156	13/4156	-29.9
	0.975622	-0.0318065	0.438695							Tnni1																						intergenic	31.8313	44.8584
	0.872955	-0.0548355	0.27343								control		MyoD		MyoG		Pbx1/2/3		Brg1
	0.870232	-0.060234	0.259982								WT	KO	WT	KO	WT	KO	WT	KO	WT	KO
	0.809761	-0.0652297	0.2236								0.000273929	0.000415587	0.00623846	0.0364272	0.0113578	0.0426418	0.00630398	0.0191233	0.0123181	0.0242514
	0.805076	-0.124418	0.220345								0.000830506	0.00139281	0.0132463	0.0361748	0.00828045	0.0414203	0.0091901	0.0122755	0.01329	0.0254318
	0.802011	-0.142567	0.145687								0	0	0.00471621	0.0437974	0.00718601	0.0341256	0.0100336	0.0119878	0.00885871	0.0248444
	0.686721	-0.213336	-0.00454484							average	0.000368145	0.000602797	0.00806697	0.0387998	0.00894143	0.0393959	0.00850924	0.0144622	0.0114889	0.0248425
	0.605102	-0.245837	-0.0837499							SEM	0.000244331	0.000412821	0.00262666	0.00249986	0.00124883	0.00265866	0.0011292	0.00233202	0.0013447	0.000340768
	0.574673	-0.381183	-0.134751							P values				0.00106227		0.000488546		0.083164		0.000651179
	0.290917	-0.426959	-0.143907
	0.210974	-0.478665	-0.175139							Mybph
	0.0567978	-0.660696	-0.283391								control		MyoD		MyoG		Pbx1/2/3		Brg1
	-0.136253	-0.720396	-0.445755								WT	KO	WT	KO	WT	KO	WT	KO	WT	KO
	-0.159024	-0.793571	-0.577318								8.85001e-05	1.11039e-06	0.0732875	0.178069	0.0433665	0.129583	0.0109386	0.0377339	0.00746293	0.0539265
	-0.348083	-0.934595	-0.67497								0.00146116	4.00437e-06	0.0656122	0.194762	0.0560482	0.135409	0.0183731	0.0278748	0.0196246	0.0578888
	-0.905076	-1.49282	-1.29332								0.00215738	0.00280253	0.0489632	0.181472	0.0342581	0.178198	0.0135628	0.0364017	0.019225	0.0811136
										average	0.00123568	0.000935883	0.062621	0.184768	0.0445576	0.14773	0.0142915	0.0340035	0.0154375	0.0643096
	Brg1-independent									SEM	0.000607782	0.000933326	0.00717933	0.00509274	0.00631837	0.0153264	0.00217686	0.00308837	0.00398895	0.00847947
	Arp5si	Ies6si	Ino80si			Arp5si	Ies6si	Ino80si		P values				0.000156352		0.00339401		0.00644101		0.00644807
	1.76611	1.40242	1.32782		average	0.363949	0.32313	0.283036
	1.46815	0.860026	1.08459		P values		0.725575	0.49397		Ppfia4
	1.32751	0.823789	0.975351								control		MyoD		MyoG		Pbx1/2/3		Brg1
	1.01475	0.809403	0.922253								WT	KO	WT	KO	WT	KO	WT	KO	WT	KO
	0.791933	0.759842	0.904201								0	0	0.416884	1.22121	0.255381	0.6855	0.0277349	0.063015	0.0698511	0.311538
	0.740288	0.752229	0.864318								0.00121381	0.000214501	0.276852	1.09905	0.205399	0.695643	0.0315878	0.0426292	0.0876502	0.198741
	0.586371	0.749486	0.643499								0.00795184	0.00125006	0.276415	0.990023	0.145299	0.652877	0.00373021	0.0374672	0.0614943	0.1635
	0.583505	0.728333	0.511173							average	0.00305522	0.000488188	0.323384	1.10343	0.202026	0.678007	0.0210177	0.0477038	0.0729985	0.224593
	0.582267	0.724254	0.501164							SEM	0.00247326	0.000385937	0.0467503	0.0667724	0.0318227	0.0129015	0.00871499	0.00779927	0.00771282	0.044647
	0.577783	0.704624	0.499797							P values				0.000666166		0.000157036		0.0846197		0.0286795
	0.565844	0.690653	0.49908
	0.53894	0.591565	0.478224
	0.529093	0.57761	0.455264
	0.524822	0.512335	0.455108
	0.505761	0.510781	0.432926
	0.487278	0.469993	0.423612
	0.475495	0.459527	0.387804
	0.40835	0.443587	0.364807
	0.36428	0.43742	0.332321
	0.350311	0.283046	0.30553
	0.314553	0.274094	0.290286
	0.270179	0.25795	0.222652
	0.222229	0.239758	0.191793
	0.17736	0.229577	0.159522
	0.147369	0.151552	0.126756
	0.122803	0.0992492	0.119551
	0.122205	0.0942981	0.0952761
	0.112401	0.0745903	0.0768101
	0.0808985	0.0685787	0.035454
	0.0725272	-0.0127061	-0.105473
	-0.00540727	-0.0682235	-0.186826
	-0.0904944	-0.0983654	-0.210554
	-0.0913505	-0.218883	-0.236664
	-0.102932	-0.476536	-0.303997
	-0.47962	-0.537902	-0.355431
	-0.628516	-0.542124	-0.848665
	-0.966934	-0.870027	-0.966991
